# Supplementary material for: Telefoncoaching bei Depression
Source: Springer Nature journal article supplement (doi:10.1007/s00115-017-0316-0), 2017-04-20
Supplement: MOESM1 [file 12236638]

## *Prognostisches Modelling*

In den zugrunde liegenden Routineabrechnungsdaten der GKV aus dem Jahr 2011 wurde pro Kalenderjahr bei 13% aller GKV-Versicherten eine Depression kodiert.<sup>9</sup> Von diesen Patienten wurden 2,8% pro Kalenderjahr wegen der Depression stationär behandelt. Dies bedeutet, dass nicht jeder Depressionspatient das gleiche Risiko hat, hospitalisiert zu werden. Daher ist es notwendig, die in Frage kommenden Patienten nach ihrem Risiko, hospitalisiert zu werden, zu differenzieren. Bei der Konzentration einer Intervention auf die meist gefährdeten Patienten könnte, so die zu prüfende Hypothese, die Krankenkasse den optimalen Nutzen bei gegebener Ressource (Geld und Personal) erreichen.

Um sich auf diejenigen Depressionspatienten zu konzentrieren, die ein erhöhtes Krankenhauseinweisungsrisiko aufweisen, wurde anhand von Routinedaten von ca. 4 Mio. deutschen GKV-Versicherten aus 80 verschiedenen Krankenkassen in den Jahren 2011 bis 2014 ein Vorhersagemodell entwickelt, welches die Wahrscheinlichkeit einer Hospitalisierung wegen Depression in den nächsten 12 Monaten vorhersagt. Das Vorhersagemodell basiert auf Informationen aus verschiedenen Hauptleistungsbereichen des GKV-Systems, insbesondere auf Informationen aus der ambulanten und stationären Versorgung, Stammdaten der Versicherten sowie Informationen über die Verordnungen von Arzneimitteln. Zusätzlich zum Vorhandensein eines erhöhten Hospitalisierungsrisikos war das Ziel, diejenigen Patienten für das TC auszuwählen, die überdurchschnittlich hohe Kosten im Zeitraum des TC (einschließlich der Krankenhauskosten) verursachen werden. Dies wurde mit Hilfe eines Kostenprognosemodells erreicht, welches die Kosten in den nächsten 12 Monaten vorhersagt. Das Kostenprognosemodell basiert ebenso wie das Hospitalisierungsmodell auf Informationen aus verschiedenen Hauptleistungsbereichen des GKV Systems. Beide Prädiktionsmodelle wurden auf Basis anonymisierter Daten entwickelt.

Das Risiko einer Hospitalisierung wurde mit Hilfe einer logistischen Regression modelliert. Das entwickelte Prädiktionsmodell weist jedem Versicherten die Wahrscheinlichkeit zu, in den nächsten 12 Monaten stationär aufgenommen zu werden (Erst- bzw. Wiederaufnahme). Da es sich bei den meisten Einflussgrößen um kategoriale Variablen mit sehr vielen Ausprägungen (z.B. ICD-Codes, ATC-Codes) handelt, von denen einige auch sehr selten vorkommen, wurde zuerst eine Dimensionsreduktion vorgenommen. Hierbei wurde eine datengetriebene Methode von Greenacre et al.<sup>13</sup> angewendet. Dabei werden einzelne Ausprägungen einer kategorialen Variable hierarchisch geclustert, basierend auf der Reduktion in der Chi-Quadrat Teststatistik, welche die Assoziation zwischen der betrachteten kategorialen Variable und der Zielgröße misst. In jedem Schritt werden zwei Ausprägungen, welche die kleinste Reduktion in der Chi-Quadrat Teststatistik verursachen, kollabiert. Dieser Prozess wird solange durchgeführt, bis die Reduktion in der Chi-Quadrat Teststatistik nicht unter einem Schwellenwert fällt, z.B. 99%.

Die Kostenprognose wurde mit Hilfe eines linearen Regressionsmodells modelliert. Ebenso wie im Falle des Hospitalisierungsprognosemodells wurde auch hier eine Dimensionsreduktion der Einflussgrößen vorgenommen. Jedoch wurde aufgrund der Stetigkeit der Zielgröße die Wilcoxon-Rang-Teststatistik eingesetzt. Ergänzend wurden auch Lasso- und Boosting-Modelle, welche eine automatische Variablenselektion vornehmen, angewandt. Allerdings wiesen diese Modelle keine Verbesserung der Vorhersagegüte auf.

## Ein- und Ausschlusskriterien der Teilnehmer am TC

### Einschlusskriterien:

- Alter 18-65 Jahre
- Im Jahr 2011 kontinuierlich bei der Krankenkasse versichert
- Diagnose Depression im Jahr vor Einschluss in die Studie (2011, ICD 10 F30.x – F39.x) ambulant oder stationär<sup>11</sup>
- Hohe Wahrscheinlichkeit eines stationären Krankenhausaufenthaltes im Interventionszeitraum aufgrund einer psychischen Erkrankung mit erwarteten Kosten  $\geq$  den mittleren Durchschnittskosten des Gesamtversichertenklientels des Kostenträgers innerhalb der nächsten 12 Monate, jedoch  $<$  als 10.000 € (prognostisches Modelling, siehe dort).
- Unterschriebene Einverständniserklärung

### Ausschlusskriterien:

- Patienten, die innerhalb der letzten 2 Jahre vor Einschluss ambulant oder stationär mit folgenden Erkrankungen nach ICD-10 behandelt wurden<sup>11</sup>
  - Delir (F05)
  - Organisch bedingte psychische Störungen (F06+F09)
  - Persönlichkeitsstörungen (F07)
  - Suchterkrankungen (F10-F19, ohne F17 Tabak)
  - Phobien/Zwänge/Dissoziative Störungen (F40, F42, F44)
  - Ess-/Schlaf-/Sexual-/Wochenbettstörungen (F50-F53)
  - Spezifische Persönlichkeitsstörungen (F60-F69)
  - Intelligenzstörungen (F70-F79)
  - Entwicklungsstörungen (F80-F89)
  - Minderjährige und Erwachsene  $>$  65 Jahre

## Statistik

Die KG der Nichtteilnehmer sollte hinsichtlich soziodemographischer Aspekte, Komorbiditäten und der Inanspruchnahme medizinischer Leistungen möglichst ähnlich zu der Gruppe der Programmteilnehmer sein. D.h. idealerweise sollte der einzige Unterschied zwischen der KG und der Gruppe der Programmteilnehmer die Teilnahme am TC sein. Die gängigste Methode, eine KG bei nicht-experimentellen Designs zu finden, ist die Verwendung von Matching-Verfahren, insbesondere das PSV[1,2].

Das Ziel des Matching-Verfahrens ist es, die zu erwartende, nicht beobachtbare Situation der Nichtteilnahme der Teilnehmer mit einer KG zu simulieren. Das heißt zu jedem Teilnehmer sucht man einen Nichtteilnehmer („statistischen Zwilling“), der mit diesem hinsichtlich aller relevanten Merkmale (Alter, Geschlecht, Komorbiditäten, Krankheitskosten, Hospitalisierungsrisiko, usw.) übereinstimmt. Bei dem PSV werden alle Merkmale, die beim Matching berücksichtigt werden sollen, zu einer einzigen Zahl (Propensity Score) verdichtet. Hierbei wird mit Hilfe einer logistischen Regression die Wahrscheinlichkeit eines Patienten, am Programm teilzunehmen, als Funktion seiner Merkmale geschätzt. Auf der Grundlage dieser Schätzung lässt sich für jeden Versicherten ein Propensity Score – die Wahrscheinlichkeit am Programm teilzunehmen - berechnen, auf dessen Grundlage das Matching erfolgen kann. Hierbei wird einem Patient der Teilnehmergruppe diejenige Person aus der potentiellen KG zugeordnet, welche ihr in der Ausprägung des Propensity Score am nächsten ist. Durch den Matching-Algorithmus wird eine neue Stichprobe generiert, die nur noch aus den Teilnehmern und den ihnen zugewiesenen Nichtteilnehmern besteht. Der Zuweisungsprozess sollte sicherstellen, dass Teilnehmer und Nichtteilnehmer mit dem gleichen Propensity Score die gleiche Verteilung von beobachteten Merkmalen aufweisen.

Damit die Merkmale als ausbalanciert zwischen den beiden Gruppen gelten können, dürfen sich nach dem Matching keine der Merkmale signifikant zwischen den Gruppen unterscheiden. Zusätzlich ist es notwendig, dass sich die Endpunkte im Matchingzeitraum zwischen den beiden Gruppen nicht signifikant unterscheiden. Hierzu werden Zweistichproben T-Tests bzw. Tests auf Anteilswerte durchgeführt[3]. Die ITT-Analyse bezog sich auf alle Patienten mit mindestens einem Telefonkontakt im Rahmen der Intervention. Der Interventions- und Beobachtungszeitraum betrug insgesamt 12 Monate und begann am 1. Juli 2012. Der Matchingzeitraum, also der Zeitraum, für den die KG gebildet wurde, wurde als 4 Quartale vor dem Beginn der Intervention definiert. Nach Ausschluss der Fälle in der Interventionsgruppe, für die kein statistischer „Zwilling“ gefunden wurde, bestand die finale Interventions- und Kontrollgruppe aus jeweils 1586 Patienten. Da nur ein Vergleich der Gruppen zu einem Zeitpunkt 12 Monate nach der Intervention stattfand (im Matchingzeitraum wurde nur die Wirksamkeit des Matchings überprüft, also in wie weit beide Gruppen ausbalanciert waren), wurde ein Zweistichprobentest bezüglich der logarithmierten Endpunkte (Kosten in den 12 Monaten nach Start der Intervention) angewandt. Die Logarithmierung erfolgte, um der Voraussetzung einer Normalverteilung des Zweistichprobentests gerecht zu werden.

### Literatur:

1. Dwinger, S, Dirmaier J, Herbarth L et al. (2013) Telephone-based health coaching for chronically ill patients: study protocol for a randomized controlled trial. *Trials* 14:337.
2. Lerner D, Adler DA, Rogers WH et al. A (2015) Randomized Clinical Trial of a Telephone Depression Intervention to Reduce Employee Presenteeism and Absenteeism. *Psychiatr Serv* 66:570-7.
3. Melchior H, Schulz H, Härter M. (2014) Faktencheck Depression. Regionale Unterschiede in der Diagnostik und Behandlung von Depressionen. Bertelsmann Stiftung, Gütersloh, S. 28-31

## **Erhebungsbogen zur Zufriedenheit mit der Programmteilnahme**

Am Ende der Intervention wurde allen Patienten ein Evaluationsbogen zugeschickt. Dieser wurde mit einem frankierten Rückumschlag versehen, mit der Bitte, nach Ausfüllen der entsprechenden Fragen den Bogen zurück zu schicken. Die Fragen sind für den Patienten selbsterklärend.
