# Supplementary material for: Telefoncoaching bei Depression
Source: Springer Nature journal article supplement (doi:10.1007/s00115-017-0316-0), 2017-04-20
Supplement: MOESM2 [file 12236638]

## Ihre Beurteilung zum Patientenbegleitprogramm Weitblick

### I Allgemeine Angaben

#### 1. Alter

≤20 Jahre    21-25 Jahre    26-30 Jahre    31-35 Jahre    36-40 Jahre    40-45 Jahre    > 45 Jahre  
                                                                       

#### 2. Geschlecht

Männlich            Weiblich  
                   

#### 3. PLZ-Bereich

0            1            2            3            4            5            6            7            8            9  
                                                                                                           

### II Organisation

#### 1. Die Gesamtdauer des Patientenbegleitprogrammes war genau richtig.

trifft absolut zu    trifft zu    trifft eher zu    trifft eher nicht zu    trifft kaum zu    trifft überhaupt nicht zu  
(1)            (2)            (3)            (4)            (5)            (6)  
                                                           

Wünsche/Verbesserungen/Kritik:

---

#### 2. Die Kontaktfrequenz des Patientenbegleitprogrammes entsprach meinen Vorstellungen.

trifft absolut zu    trifft zu    trifft eher zu    trifft eher nicht zu    trifft kaum zu    trifft überhaupt nicht zu  
(1)            (2)            (3)            (4)            (5)            (6)  
                                                           

Wünsche/Verbesserungen/Kritik:

---

**3. Die zur Verfügung gestellten Versandmaterialien waren hilfreich und wurden von mir regelmäßig genutzt.**

|                          |                          |                          |                             |                          |                                  |
|--------------------------|--------------------------|--------------------------|-----------------------------|--------------------------|----------------------------------|
| trifft absolut zu<br>(1) | trifft zu<br>(2)         | trifft eher zu<br>(3)    | trifft eher nicht zu<br>(4) | trifft kaum zu<br>(5)    | trifft überhaupt nicht zu<br>(6) |
| <input type="checkbox"/> | <input type="checkbox"/> | <input type="checkbox"/> | <input type="checkbox"/>    | <input type="checkbox"/> | <input type="checkbox"/>         |

Wünsche/Verbesserungen/Kritik:

---

**4. Die vereinbarten Gesprächstermine wurden eingehalten und fanden pünktlich statt.**

|                          |                          |                          |                             |                          |                                  |
|--------------------------|--------------------------|--------------------------|-----------------------------|--------------------------|----------------------------------|
| trifft absolut zu<br>(1) | trifft zu<br>(2)         | trifft eher zu<br>(3)    | trifft eher nicht zu<br>(4) | trifft kaum zu<br>(5)    | trifft überhaupt nicht zu<br>(6) |
| <input type="checkbox"/> | <input type="checkbox"/> | <input type="checkbox"/> | <input type="checkbox"/>    | <input type="checkbox"/> | <input type="checkbox"/>         |

Wünsche/Verbesserungen/Kritik:

---

**III Coach / Gesprächspartner**

**1. Wie zufrieden waren Sie mit Ihrer/Ihrem Gesprächspartner/in in Bezug auf:**

1.1 Klarheit und Verständlichkeit?

|                          |                          |                          |                          |                          |                          |
|--------------------------|--------------------------|--------------------------|--------------------------|--------------------------|--------------------------|
| sehr zufrieden<br>(1)    | zufrieden<br>(2)         | eher zufrieden<br>(3)    | eher unzufrieden<br>(4)  | unzufrieden<br>(5)       | Sehr unzufrieden<br>(6)  |
| <input type="checkbox"/> |

Wünsche/Verbesserungen/Kritik:

---

1.2 Eingehen auf persönliche Bedürfnisse?

|                          |                          |                          |                          |                          |                          |
|--------------------------|--------------------------|--------------------------|--------------------------|--------------------------|--------------------------|
| sehr zufrieden<br>(1)    | zufrieden<br>(2)         | eher zufrieden<br>(3)    | eher unzufrieden<br>(4)  | unzufrieden<br>(5)       | Sehr unzufrieden<br>(6)  |
| <input type="checkbox"/> |

Wünsche/Verbesserungen/Kritik:

---

1.3 Fachliche Kompetenz?

|                          |                          |                          |                          |                          |                          |
|--------------------------|--------------------------|--------------------------|--------------------------|--------------------------|--------------------------|
| sehr zufrieden<br>(1)    | zufrieden<br>(2)         | eher zufrieden<br>(3)    | eher unzufrieden<br>(4)  | unzufrieden<br>(5)       | Sehr unzufrieden<br>(6)  |
| <input type="checkbox"/> |

Wünsche/Verbesserungen/Kritik:

---

1.4 Praxisnähe?

|                          |                          |                          |                          |                          |                          |
|--------------------------|--------------------------|--------------------------|--------------------------|--------------------------|--------------------------|
| sehr zufrieden<br>(1)    | zufrieden<br>(2)         | eher zufrieden<br>(3)    | eher unzufrieden<br>(4)  | unzufrieden<br>(5)       | Sehr unzufrieden<br>(6)  |
| <input type="checkbox"/> |

Wünsche/Verbesserungen/Kritik:

---

**IV Programmkonzept**

**1. Welcher Aussage stimmen Sie am ehesten zu, wenn Sie heute daran zurückdenken, wie es Ihnen beim Beginn der Betreuung gesundheitlich ging?**

|                                                       |                                                                   |                                                  |                                                            |
|-------------------------------------------------------|-------------------------------------------------------------------|--------------------------------------------------|------------------------------------------------------------|
| Mein gesundheitlicher Zustand hat sich verschlechtert | Mein gesundheitlicher Zustand hat sich kaum / gar nicht verändert | Es geht mir heute besser als beim Programmbeginn | Es geht mir heute sehr viel besser als beim Programmbeginn |
| <input type="checkbox"/>                              | <input type="checkbox"/>                                          | <input type="checkbox"/>                         | <input type="checkbox"/>                                   |

**2. Das Patientenbegleitprogramm entsprach genau meinen Erwartungen?**

|                          |                          |                          |                             |                          |                                  |
|--------------------------|--------------------------|--------------------------|-----------------------------|--------------------------|----------------------------------|
| trifft absolut zu<br>(1) | trifft zu<br>(2)         | trifft eher zu<br>(3)    | trifft eher nicht zu<br>(4) | trifft kaum zu<br>(5)    | trifft überhaupt nicht zu<br>(6) |
| <input type="checkbox"/> | <input type="checkbox"/> | <input type="checkbox"/> | <input type="checkbox"/>    | <input type="checkbox"/> | <input type="checkbox"/>         |

Wünsche/Verbesserungen/Kritik:

---

**3. Im Rahmen des Programms konnte ich Maßnahmen und Ziele zur Verbesserung meiner Lebensqualität identifizieren.**

| trifft absolut zu<br>(1) | trifft zu<br>(2)         | trifft eher zu<br>(3)    | trifft eher nicht zu<br>(4) | trifft kaum zu<br>(5)    | trifft überhaupt nicht zu<br>(6) |
|--------------------------|--------------------------|--------------------------|-----------------------------|--------------------------|----------------------------------|
| <input type="checkbox"/> | <input type="checkbox"/> | <input type="checkbox"/> | <input type="checkbox"/>    | <input type="checkbox"/> | <input type="checkbox"/>         |

Wünsche/Verbesserungen/Kritik:

---

**4. Die identifizierten Maßnahmen und Ziele wurden von mir umgesetzt.**

| trifft absolut zu<br>(1) | trifft zu<br>(2)         | trifft eher zu<br>(3)    | trifft eher nicht zu<br>(4) | trifft kaum zu<br>(5)    | trifft überhaupt nicht zu<br>(6) |
|--------------------------|--------------------------|--------------------------|-----------------------------|--------------------------|----------------------------------|
| <input type="checkbox"/> | <input type="checkbox"/> | <input type="checkbox"/> | <input type="checkbox"/>    | <input type="checkbox"/> | <input type="checkbox"/>         |

Wünsche/Verbesserungen/Kritik:

---

**5. Bei der Identifizierung und Umsetzung der Maßnahmen und Ziele hat mich mein Gesundheitsberater / Gesundheitsberaterin gut unterstützt.**

| trifft absolut zu<br>(1) | trifft zu<br>(2)         | trifft eher zu<br>(3)    | trifft eher nicht zu<br>(4) | trifft kaum zu<br>(5)    | trifft überhaupt nicht zu<br>(6) |
|--------------------------|--------------------------|--------------------------|-----------------------------|--------------------------|----------------------------------|
| <input type="checkbox"/> | <input type="checkbox"/> | <input type="checkbox"/> | <input type="checkbox"/>    | <input type="checkbox"/> | <input type="checkbox"/>         |

Wünsche/Verbesserungen/Kritik:

---

**6. Das Patientenbegleitprogramm hat mir in meinem täglichen praktischen Leben konkret weitergeholfen.**

| trifft absolut zu<br>(1) | trifft zu<br>(2)         | trifft eher zu<br>(3)    | trifft eher nicht zu<br>(4) | trifft kaum zu<br>(5)    | trifft überhaupt nicht zu<br>(6) |
|--------------------------|--------------------------|--------------------------|-----------------------------|--------------------------|----------------------------------|
| <input type="checkbox"/> | <input type="checkbox"/> | <input type="checkbox"/> | <input type="checkbox"/>    | <input type="checkbox"/> | <input type="checkbox"/>         |

Wünsche/Verbesserungen/Kritik:

---

**7. Das Patientenbegleitprogramm würde ich jederzeit weiterempfehlen?**

|                          |                          |                          |                             |                          |                                  |
|--------------------------|--------------------------|--------------------------|-----------------------------|--------------------------|----------------------------------|
| trifft absolut zu<br>(1) | trifft zu<br>(2)         | trifft eher zu<br>(3)    | trifft eher nicht zu<br>(4) | trifft kaum zu<br>(5)    | trifft überhaupt nicht zu<br>(6) |
| <input type="checkbox"/> | <input type="checkbox"/> | <input type="checkbox"/> | <input type="checkbox"/>    | <input type="checkbox"/> | <input type="checkbox"/>         |

Wünsche/Verbesserungen/Kritik:

---

**8. Würden Sie sich auch in Bezug auf das Programm mit Online-Medien wie z. B. Apps oder ähnliches beschäftigen?**

|                          |                          |
|--------------------------|--------------------------|
| Ja                       | Nein                     |
| <input type="checkbox"/> | <input type="checkbox"/> |

**9. An welcher Stelle würden Sie, wenn Sie die Möglichkeit hätten, das Programm verändern, verbessern oder anpassen?**

---

---

---

---

---

---

---

---

**Herzlichen Dank, dass Sie sich die Zeit genommen haben, um unsere Fragen zu beantworten!**

**Ihr Team der Heimat Krankenkasse**
